# Supplementary material for: Temporal resolution of NAIL-MS of tRNA, rRNA and Poly-A RNA is overcome by actinomycin D
Source: Royal Society of Chemistry journal article supplement (doi:10.1039/d2cb00243d), 2023-01-01
Supplement: d2cb00243d1.pdf [file d2cb00243d1.pdf]

## Temporal resolution of NAIL-MS of tRNA, rRNA and Poly-A RNA is overcome by actinomycin D

Felix Hagelskamp,<sup>\*a</sup> Kayla Borland,<sup>a</sup> Gregor Ammann,<sup>b</sup> and Stefanie M. Kaiser<sup>a,b</sup>

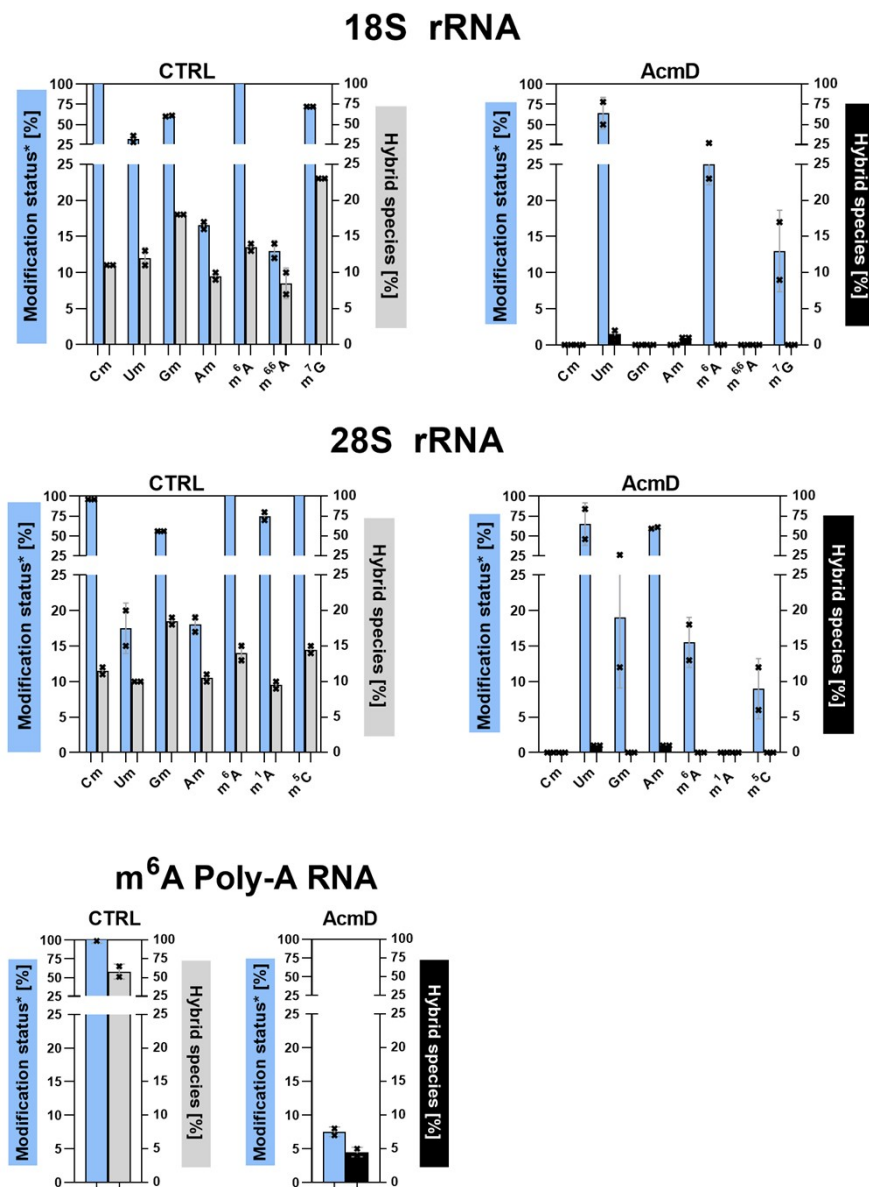

Fig S1: Occurrence of hybrid and new modifications in rRNA and Poly-A RNA 8 hours after AcmD treatment. Modification status of new transcripts is calculated by dividing the absolute abundance of new modifications (per new adenosine) at time point 8 hours by the absolute abundance of original modifications (per original adenosine) at time point 0 hours (equation 2). Hybrid species [%] is calculated according to equation 1 given in the result section.

**A**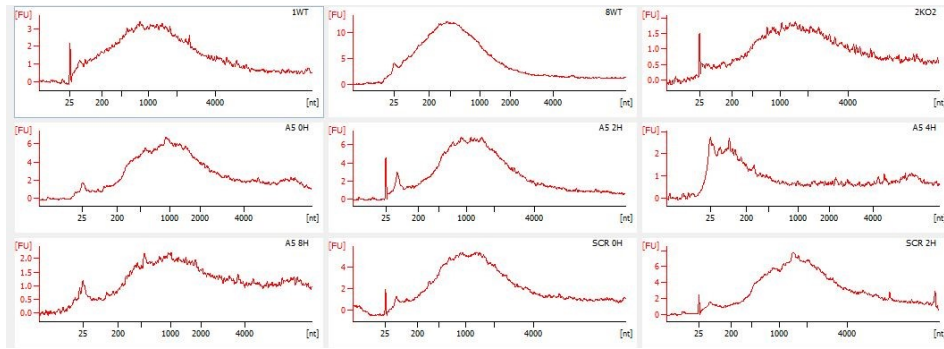**B**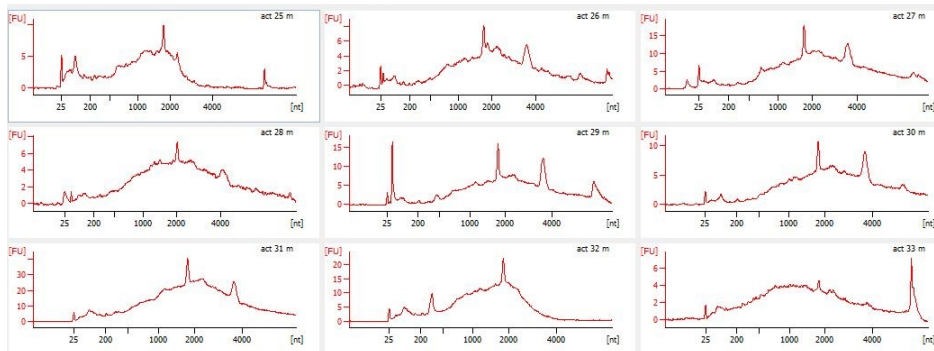

Fig S2: Exemplary electropherograms of Poly-A RNA purified in the NAIL-MS context of this manuscript. A RNA size distribution of Poly-A RNA isolated through Poly-A enrichment, subsequent rRNA depletion and 2<sup>nd</sup> Poly-A enrichment. B RNA size distribution of Poly-A RNA isolated through Poly-A enrichment and subsequent rRNA depletion omitting the 2<sup>nd</sup> Poly-A enrichment step. Here, some residual 18S and 28S rRNA remains visible in the profile.

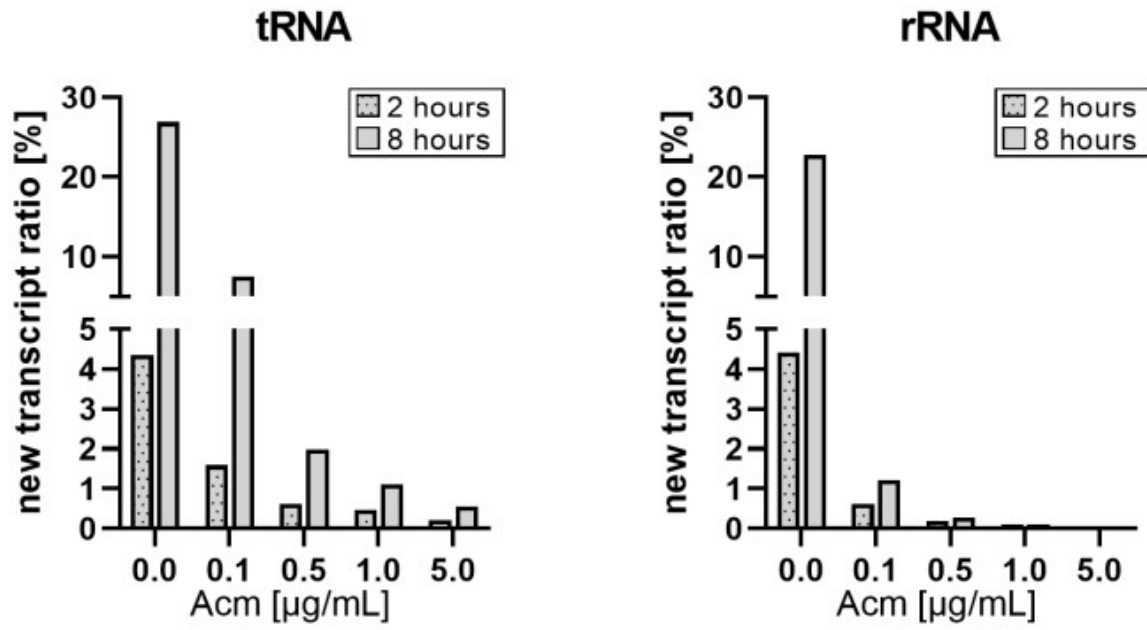

Fig. S3: New transcript ratio after 2 and 8 hours after ActinomycinD (Acm) treatment.

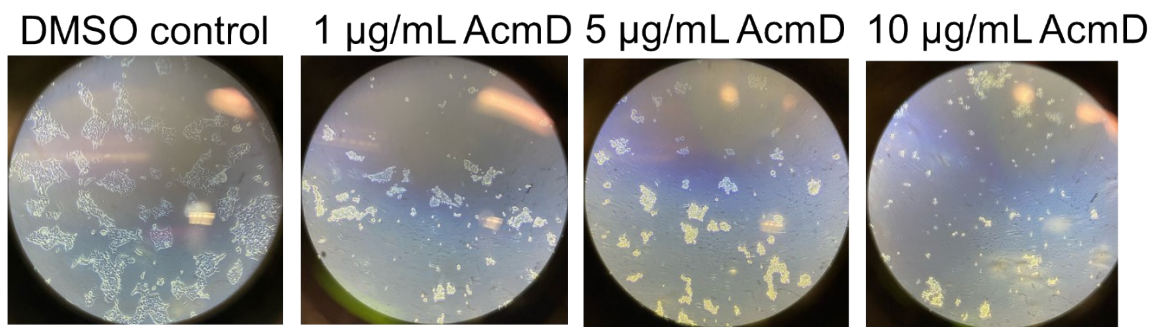

Fig. S4: Disturbed distribution of HEK cells 8 hours after DMSO and AcmD incubation.
